# Supplementary material
Source: PubMed Central journal article supplement (PMC10926738)
Supplement: NIHPP2023.03.04.531100V2-supplement-1.pdf [file NIHPP2023.03.04.531100V2-supplement-1.pdf]

482 **SUPPLEMENTAL FIGURES**

| <b>Covariates:</b>                                                                                                                                                                                                                                                                                         | <b>Mean ± standard deviation, or % across Arivale:</b>                             |
|------------------------------------------------------------------------------------------------------------------------------------------------------------------------------------------------------------------------------------------------------------------------------------------------------------|------------------------------------------------------------------------------------|
| Sex                                                                                                                                                                                                                                                                                                        | 65.1% Female                                                                       |
| BMI                                                                                                                                                                                                                                                                                                        | 27.2 ± 5.89                                                                        |
| Age                                                                                                                                                                                                                                                                                                        | 46.36 ± 12.96                                                                      |
| eGFR                                                                                                                                                                                                                                                                                                       | 89.07 ± 20.20                                                                      |
| CRP                                                                                                                                                                                                                                                                                                        | 2.40 ± 4.76                                                                        |
| LDL                                                                                                                                                                                                                                                                                                        | 114.17 ± 33.77                                                                     |
| A1C                                                                                                                                                                                                                                                                                                        | 5.49 ± 0.57                                                                        |
| <b>Highlighted exclusionary criteria:</b>                                                                                                                                                                                                                                                                  |                                                                                    |
| Percent with self-reported kidney disease                                                                                                                                                                                                                                                                  | 3.00% (119 out of 3,955 participants with BMF data available withheld from cohort) |
| Percent IBS or IBD                                                                                                                                                                                                                                                                                         | 3.23% (128 out of 3,955 participants with BMF data available withheld from cohort) |
| <b>Exclusionary features (988 out of 3,955 participants with BMF data, or 25% of the initial BMF cohort, answered affirmatively to any of these and were excluded from the analyses. The final N of remaining participants after merging with covariates was N = 1,425 for the final baseline cohort):</b> |                                                                                    |
| Self - current history - bladder infection                                                                                                                                                                                                                                                                 |                                                                                    |
| Self - current history - kidney disease                                                                                                                                                                                                                                                                    |                                                                                    |
| Self - current history - kidney infection                                                                                                                                                                                                                                                                  |                                                                                    |
| Self - current history - kidney stones                                                                                                                                                                                                                                                                     |                                                                                    |
| Self - current history - bladder/kidney - other                                                                                                                                                                                                                                                            |                                                                                    |
| Self - current history - polycystic kidney disease (PKD)                                                                                                                                                                                                                                                   |                                                                                    |
| Self - current history - urinary incontinence                                                                                                                                                                                                                                                              |                                                                                    |
| Self - current history - kidney cancer                                                                                                                                                                                                                                                                     |                                                                                    |
| Self - current history - celiac disease                                                                                                                                                                                                                                                                    |                                                                                    |
| Self - current history - colonic Crohn's disease                                                                                                                                                                                                                                                           |                                                                                    |
| Self - current history - diverticulosis                                                                                                                                                                                                                                                                    |                                                                                    |
| Self - current history - gastroesophageal reflux disease (GERD)                                                                                                                                                                                                                                            |                                                                                    |
| Self - current history - ileal Crohn's disease                                                                                                                                                                                                                                                             |                                                                                    |
| Self - current history - irritable bowel syndrome (IBS)                                                                                                                                                                                                                                                    |                                                                                    |
| Self - current history - inflammatory bowel disease (IBD)                                                                                                                                                                                                                                                  |                                                                                    |
| Self - current history - ulcerative colitis                                                                                                                                                                                                                                                                |                                                                                    |
| Self - current history - peptic ulcer                                                                                                                                                                                                                                                                      |                                                                                    |
| Self - laxatives usage                                                                                                                                                                                                                                                                                     |                                                                                    |
| Self - anticoagulation or cholesterol drugs usage                                                                                                                                                                                                                                                          |                                                                                    |
| Self - blood pressure drugs usage                                                                                                                                                                                                                                                                          |                                                                                    |

483

484 **Figure S1. The modeling covariates and exclusionary criteria.** Out of the 3,955 total Arivale  
 485 participants that had BMF data, 3.00% self-reported kidney disease (the kidney-related  
 486 questions in the exclusionary features) and 3.23% self-reported IBS or IBD. An initial baseline  
 487 cohort of 3,132 participants that had health history survey questionnaire data was available. The  
 488 participants that answered affirmatively to the exclusionary features were removed from the  
 489 analysis, resulting in 25% of the initial cohort with BMF data being filtered down to N = 1,561,  
 490 and subsequently, a final baseline cohort of 1,425 individuals after merging for covariates.

491

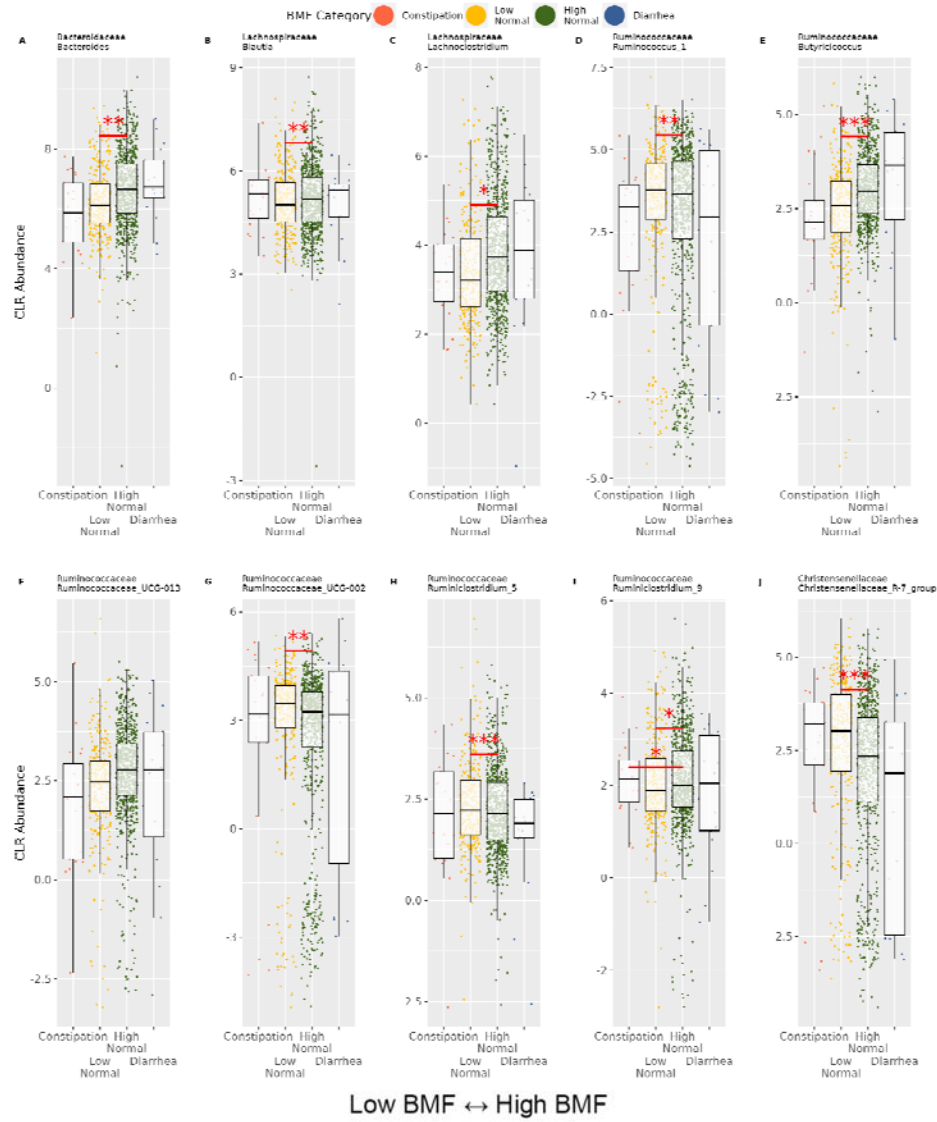

493 **Figure S2. The top 10 most abundant genera significantly associated with BMF (A-J).**

494 Significant genera from the CORNCOB analysis in order of decreasing CLR-transformed  
495 abundance. The line in each plot denotes significant differences from the reference category  
496 (“High Normal” BMF), and asterisks denote FDR-corrected significance threshold. (\*\*):  $p <$   
497  $0.0001$ , (\*\*):  $0.0001 < p < 0.01$ , (\*):  $0.01 < p < 0.05$ . The horizontal axes are annotated as four  
498 BMF categories: “Constipation” (BMF = 1-2X per week), “Low Normal” (BMF = 3-6X per week),  
499 “High Normal” (BMF = 1-3X per day) which is the reference category in regression, and  
500 “Diarrhea” (BMF = 4X or more per day).

501

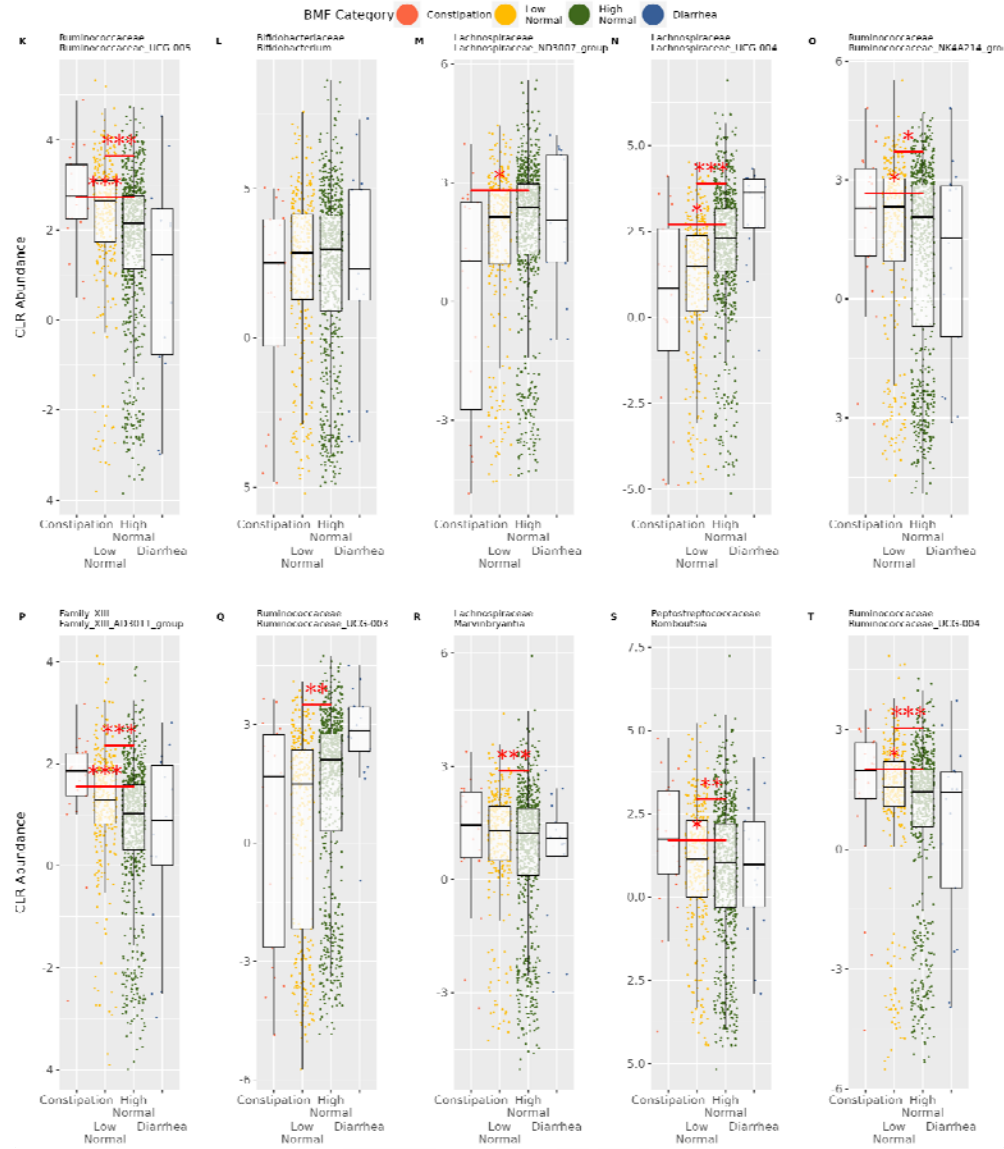

502

Low BMF ↔ High BMF

503 **Figure S3. The top 11-20 most abundant genera associated with BMF (K-T).** Significant  
504 genera from the CORNCOB analysis in order of decreasing CLR-transformed abundance. The  
505 line in each plot denotes significant differences from the reference category (“High Normal”  
506 BMF), and asterisks denote FDR-corrected significance threshold. (\*\*\*):  $p < 0.0001$ , (\*\*):  $0.0001$   
507  $< p < 0.01$ , (\*):  $0.01 < p < 0.05$ . The horizontal axes are annotated as four BMF categories:  
508 “Constipation” (BMF = 1-2X per week), “Low Normal” (BMF = 3-6X per week), “High Normal”  
509 (BMF = 1-3X per day) which is the reference category in regression, and “Diarrhea” (BMF = 4X  
510 or more per day).

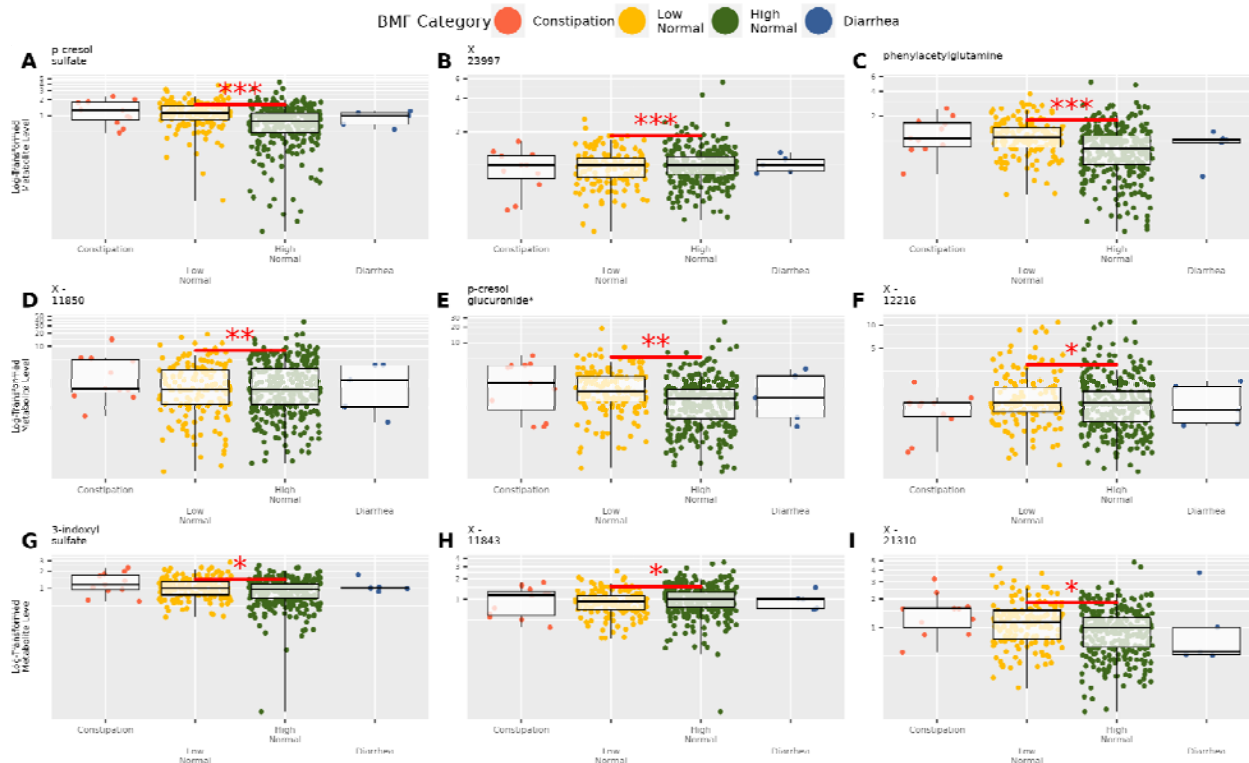

511  
 512 **Figure S4. Significant BMF-associated plasma metabolites boxplots (A-I).** Significant  
 513 plasma metabolites from the LIMMA analysis. The horizontal axes are annotated as four BMF  
 514 categories: “Constipation” (BMF = 1-2X per week), “Low Normal” (BMF = 3-6X per week), “High  
 515 Normal” (BMF = 1-3X per day) which is the reference category in regression, and “Diarrhea”  
 516 (BMF = 4X or more per day). Red significant comparison lines across each plot denote  
 517 significant differences from the reference category (“High Normal” BMF), and asterisks denote  
 518 FDR-corrected significance threshold. (\*\*\*):  $p < 0.0001$ , (\*\*):  $0.0001 < p < 0.01$ , (\*):  $0.01 < p <$   
 519  $0.05$ .

Low BMF ↔ High BMF

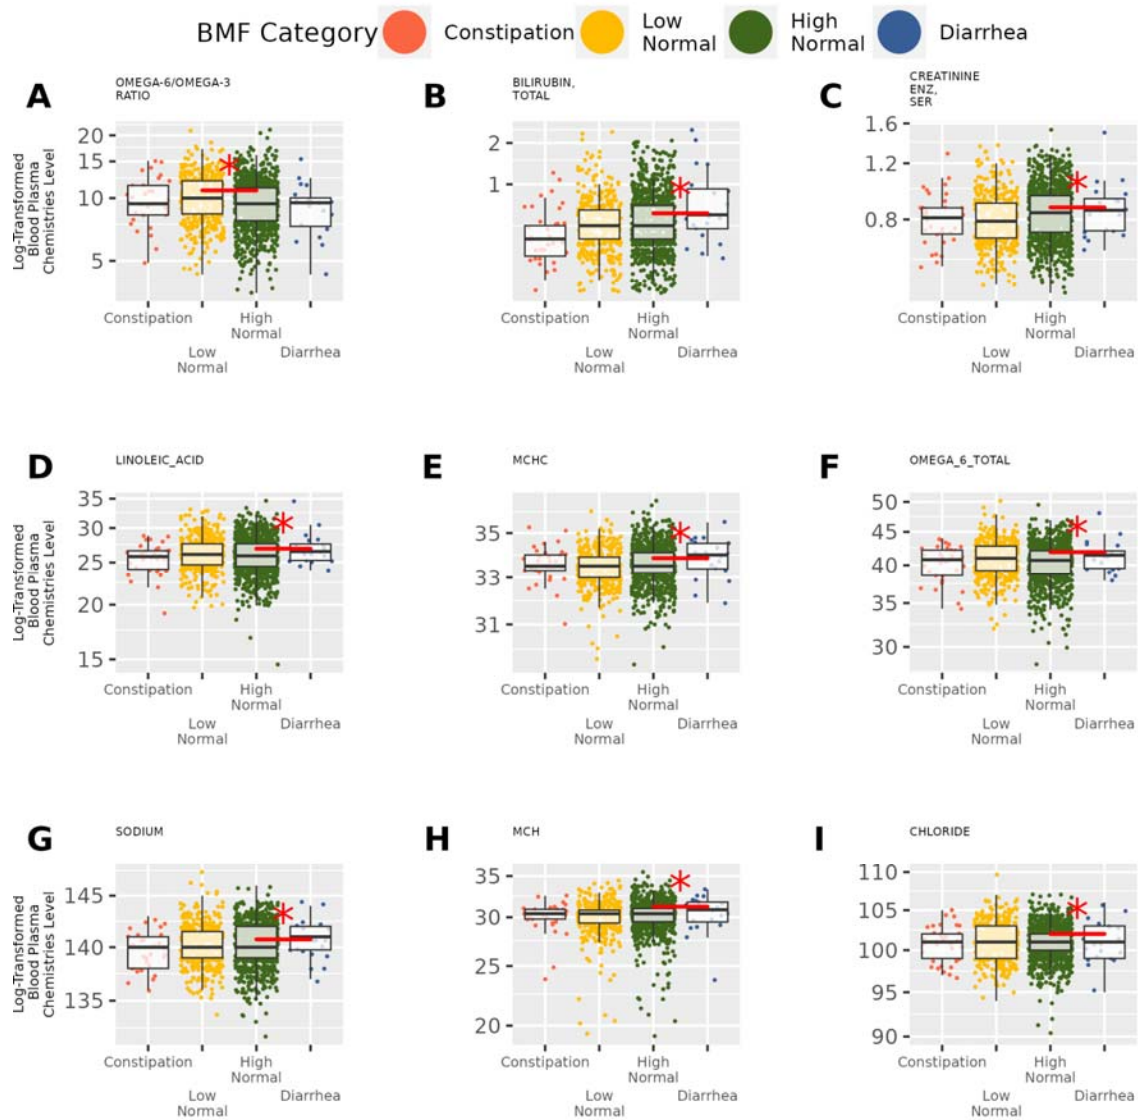

520

Low BMF ↔ High BMF

521 **Figure S5. Significant BMF-associated clinical chemistries boxplots (A-I).** Significant  
522 clinical chemistries from the LIMMA analysis. The horizontal axes are annotated as four BMF  
523 categories: “Constipation” (BMF = 1-2X per week), “Low Normal” (BMF = 3-6X per week), “High  
524 Normal” (BMF = 1-3X per day) which is the reference category in regression, and “Diarrhea”  
525 (BMF = 4X or more per day). Red significant comparison lines across each plot denote  
526 significant differences from the reference category (“High Normal” BMF), and asterisks denote  
527 FDR-corrected significance threshold. (\*\*\*):  $p < 0.0001$ , (\*\*):  $0.0001 < p < 0.01$ , (\*):  $0.01 < p <$   
528  $0.05$ .



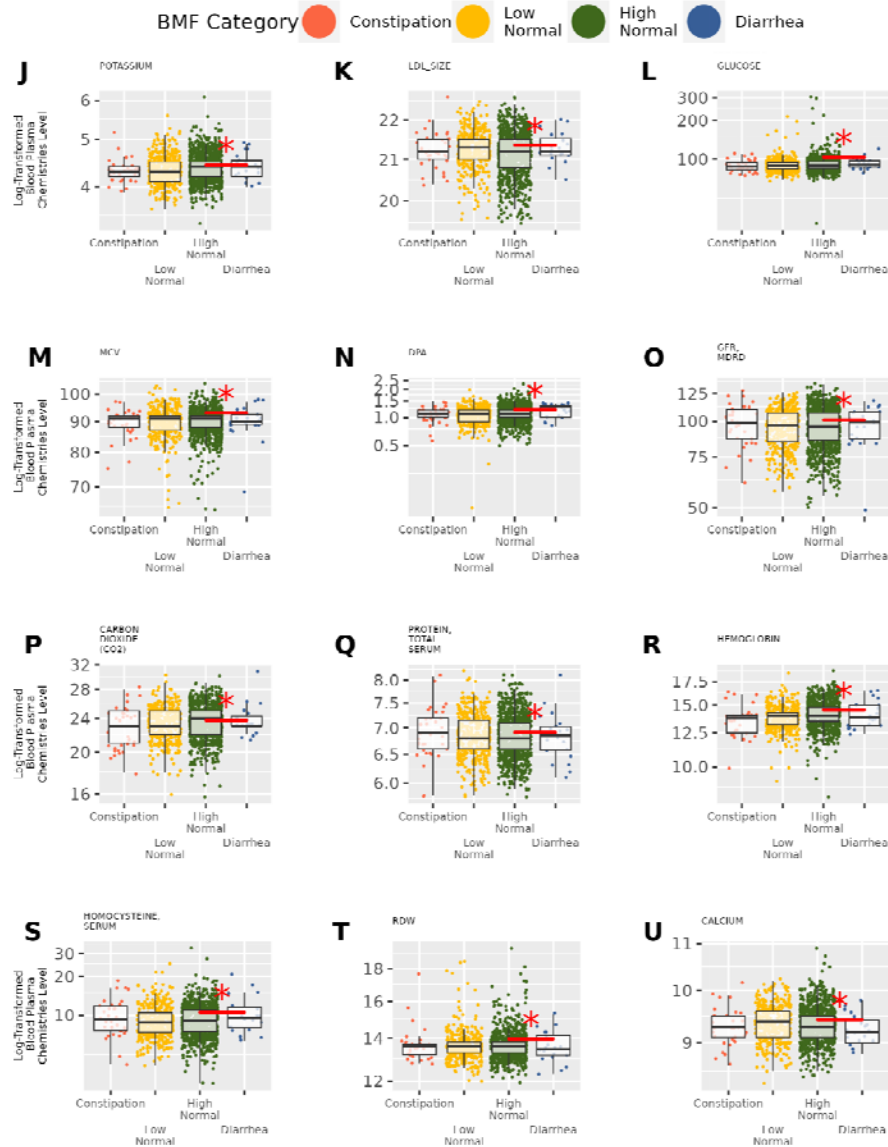

529

Low BMF ↔ High BMF

530 **Figure S6. The remaining significant BMF-associated clinical chemistries boxplots (J-U).**

531 The remaining significant clinical chemistries from the LIMMA analysis. The horizontal axes are  
532 annotated as four BMF categories: “Constipation” (BMF = 1-2X per week), “Low Normal” (BMF  
533 = 3-6X per week), “High Normal” (BMF = 1-3X per day) which is the reference category in  
534 regression, and “Diarrhea” (BMF = 4X or more per day). Red significant comparison lines  
535 across each plot denote significant differences from the reference category (“High Normal”  
536 BMF), and asterisks denote FDR-corrected significance threshold. (\*\*\*):  $p < 0.0001$ , (\*\*):  $0.0001$   
537  $< p < 0.01$ , (\*):  $0.01 < p < 0.05$ .

538

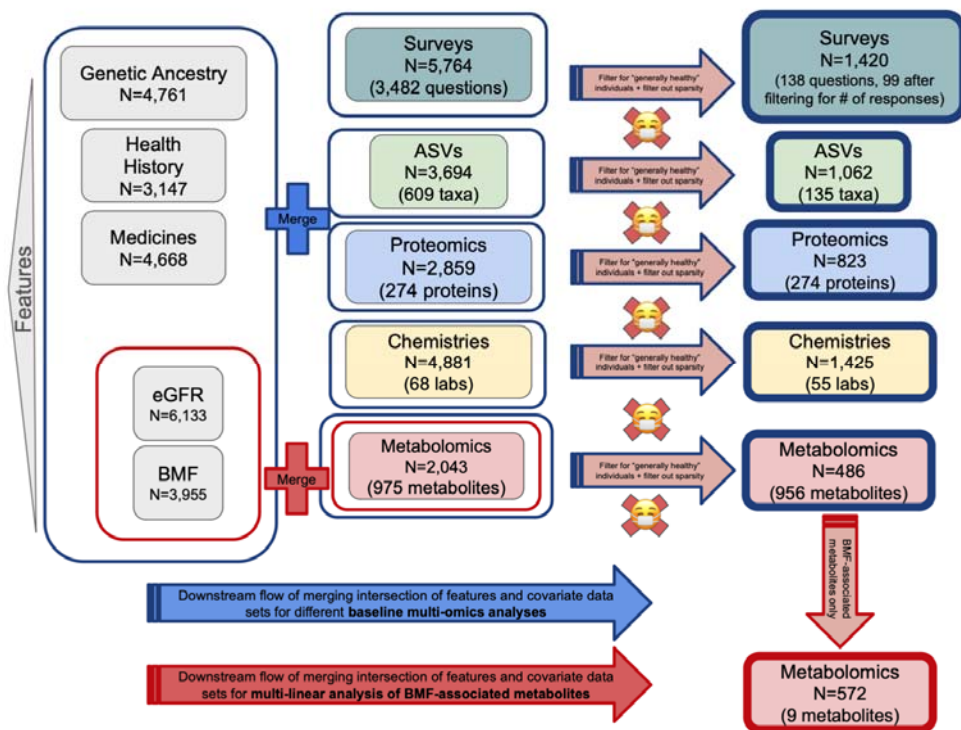

539

540 **Figure S7. Flow Chart for Cohort Selection of Baseline Population.** Individuals with the full  
541 complement of covariate data (sex, age, BMI, and CRP, LDL, A1C, and PCs1-3) were further  
542 filtered for having available baseline data for each of the following: surveys, microbiome profiles,  
543 proteomics, clinical chemistries (e.g. complete blood count, or CBC; and comprehensive  
544 metabolic panel, or CMP) and metabolomics. The “generally-healthy” exclusion criteria were  
545 then imposed (38.5% excluded; see Method Details), along with sparsity or non-missingness  
546 minimums for the features in the ‘omics data ( $\geq 30\%$  prevalence for gut microbiome data,  
547 metabolomics and clinical chemistries;  $\geq 50\%$  prevalence for proteomics; and  $\geq 90\%$  prevalence  
548 and  $\geq 10\%$  affirmative for binary responses in the survey questions). These filters resulted in the  
549 final sub-cohort numbers shown on the right side of the figure in blue outlines. Additionally, the  
550 eGFR and BMF data frames were merged with the metabolomics data frame and filtered by the  
551 “generally-healthy” exclusionary criteria to achieve 572 participants with the data for the 9 BMF-  
552 associated metabolites eGFR regression and mediation analysis.

| OLS Regression Results |                  |                     |          |       |         |         |
|------------------------|------------------|---------------------|----------|-------|---------|---------|
| Dep. Variable:         | eGFR             | R-squared:          | 0.082    |       |         |         |
| Model:                 | OLS              | Adj. R-squared:     | 0.067    |       |         |         |
| Method:                | Least Squares    | F-statistic:        | 5.547    |       |         |         |
| Date:                  | Sun, 18 Feb 2024 | Prob (F-statistic): | 2.42e-07 |       |         |         |
| Time:                  | 07:29:22         | Log-Likelihood:     | -2465.4  |       |         |         |
| No. Observations:      | 572              | AIC:                | 4951.    |       |         |         |
| Df Residuals:          | 562              | BIC:                | 4994.    |       |         |         |
| Df Model:              | 9                |                     |          |       |         |         |
| Covariance Type:       | nonrobust        |                     |          |       |         |         |
|                        | coef             | std err             | t        | P> t  | [0.025  | 0.975]  |
| const                  | 115.0755         | 4.841               | 23.770   | 0.000 | 105.566 | 124.585 |
| bowel                  | -3.9902          | 1.496               | -2.667   | 0.008 | -6.929  | -1.051  |
| p-cresol sulfate       | -2.6898          | 2.473               | -1.088   | 0.277 | -7.548  | 2.168   |
| X - 23997              | 1.7076           | 1.423               | 1.200    | 0.231 | -1.087  | 4.502   |
| phenylacetylglutamine  | 2.2073           | 2.247               | 0.982    | 0.326 | -2.207  | 6.622   |
| X - 11850              | -0.4421          | 0.359               | -1.232   | 0.218 | -1.147  | 0.263   |
| p-cresol glucuronide   | 0.3677           | 0.490               | 0.750    | 0.454 | -0.595  | 1.330   |
| X - 12216              | -1.9827          | 0.787               | -2.520   | 0.012 | -3.528  | -0.437  |
| 3-indoxyl sulfate      | -9.6859          | 2.249               | -4.307   | 0.000 | -14.104 | -5.268  |
| X - 11843              | 0.0527           | 0.554               | 0.095    | 0.924 | -1.036  | 1.141   |
| Omnibus:               | 39.704           | Durbin-Watson:      | 1.841    |       |         |         |
| Prob(Omnibus):         | 0.000            | Jarque-Bera (JB):   | 22.585   |       |         |         |
| Skew:                  | -0.333           | Prob(JB):           | 1.25e-05 |       |         |         |
| Kurtosis:              | 2.290            | Cond. No.           | 45.4     |       |         |         |

553

554 **Figure S8. OLS regression resulting from eGFR ~ BMF-associated metabolites + BMF.**

555 The p-value for the overall generalized-linear model (eGFR ~ BMF-related metabolites) was

556 significant (N = 572, p = 2.42E-7, R<sup>2</sup> = 0.082) and so were the p-values of the individual  $\beta$ -

557 coefficients for 3-IS ( $\beta_{3-IS} = -9.69$ , p = 1.96E-5), BMF (denoted "bowel";  $\beta_{BMF} = -3.99$ , p = 7.88E-

558 3), and X - 12216 ( $\beta_{X-12216} = -1.98$ , p = 1.20E-2).
